# Supplementary material for: Asymmetric Au-core Pd-shell nanoparticles supported on reduced graphene oxide for enhanced electrocatalytic activity
Source: Royal Society of Chemistry journal article supplement (doi:10.1039/c6ra19155j), 2016-01-01
Supplement: c6ra19155j1.pdf [file c6ra19155j1.pdf]

Electronic Supplementary Information (ESI)

# Asymmetric Au-core Pd-shell Nanoparticles Supported on Reduced Graphene Oxide for Enhanced Electrocatalytic Activity

*Sungmin Noh, and Jun Ho Shim\**

Department of Chemistry and Institute of Basic Science, Daegu University, Gyeongsan 38453,  
Republic of Korea

---

\*Corresponding author: Fax: +82-53-850-6449; Tel: +82-53-850-6448

E-mail address: junhoshim@daegu.ac.kr (J. H. Shim)

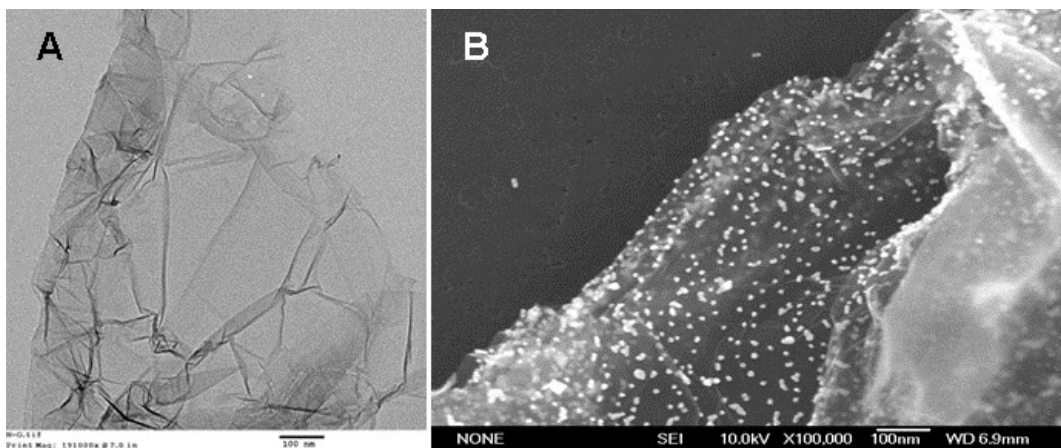

**Fig. S1** Typical TEM and SEM images of the (A) rGO nanosheets and (B) Au<sub>0.61</sub>Pd<sub>0.39</sub> nanoparticles supported on rGO, respectively.

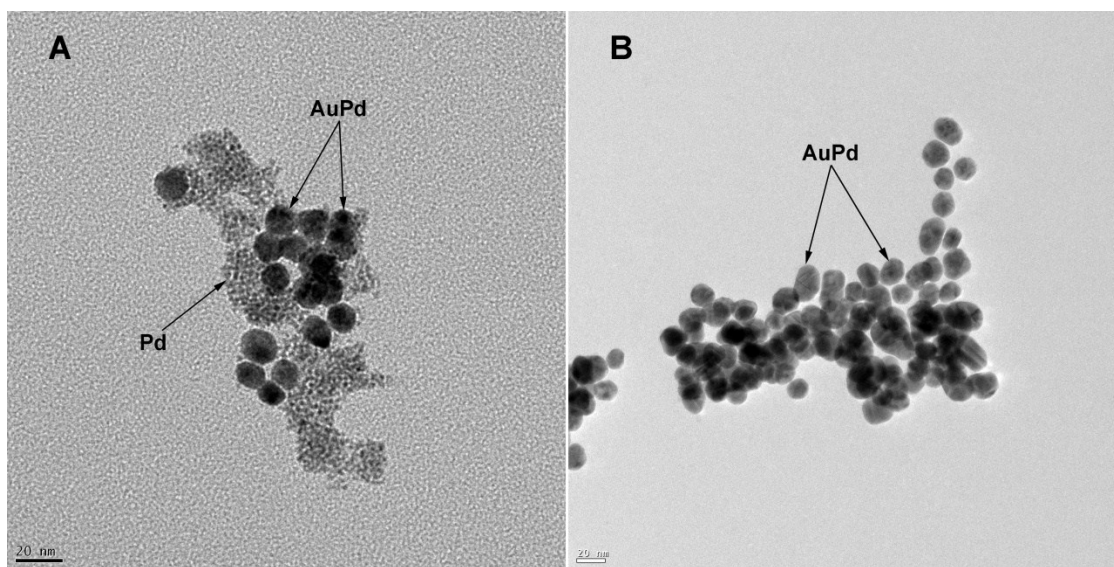

**Fig. S2** Representative TEM images of (A) symmetric and (B) asymmetric AuPd nanoparticles obtained by adding a PdCl<sub>2</sub> solution to colloidal GNs and GNs-adsorbed glass substrate, respectively. The large isolated monometallic Pd nanoparticles synthesized by a spontaneous reduction reaction were not observed in the asymmetric AuPd catalysts.

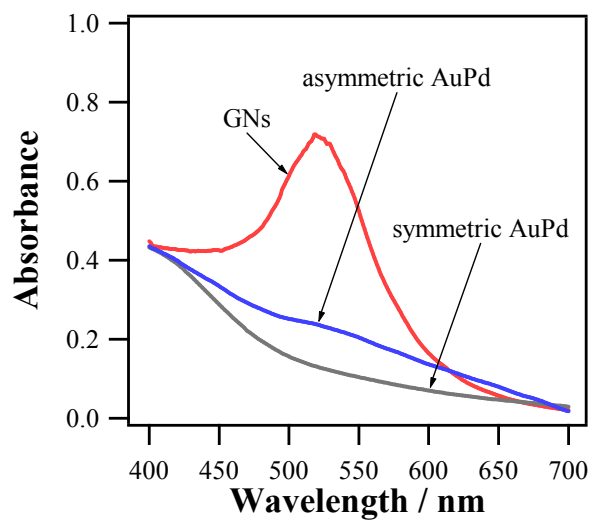

**Fig. S3** UV-Vis spectra of GNs, symmetric and asymmetric AuPd nanoparticles. Both types of AuPd nanoparticles were synthesized using a 5.0 mM of PdCl<sub>2</sub> aqueous solution.

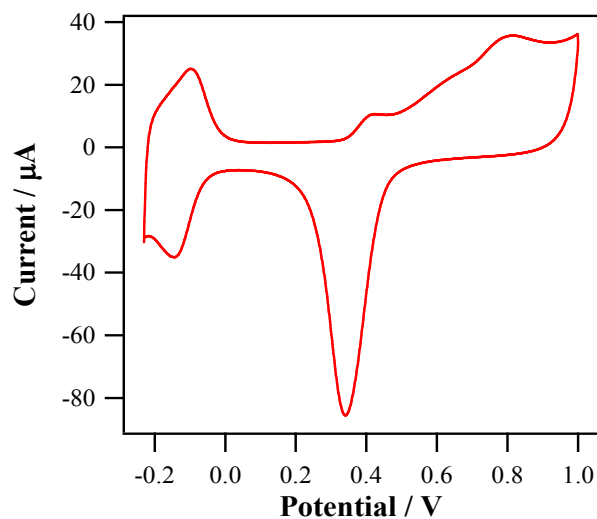

**Fig. S4** Cyclic voltammogram obtained from Pd-20/C-modified GC electrode in the N<sub>2</sub>-saturated 0.1 M HClO<sub>4</sub> solution at a scanning rate of 10 mV s<sup>-1</sup>.

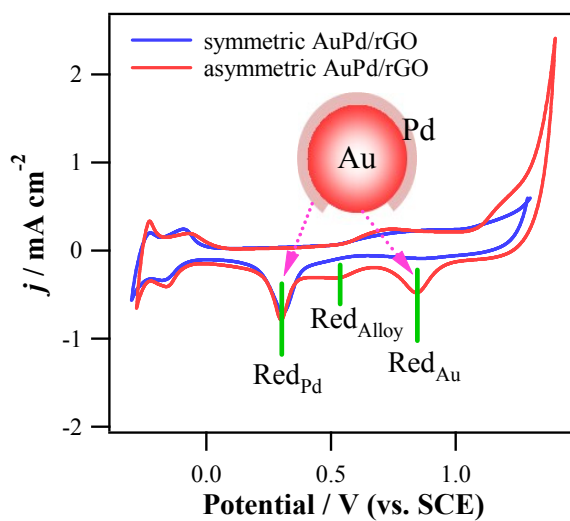

**Fig. S5** Cyclic voltammogram obtained from symmetric AuPd/rGO or asymmetric AuPd/rGO-modified GC electrode in the N<sub>2</sub>-saturated 0.1 M HClO<sub>4</sub> solution at a scanning rate of 50 mV s<sup>-1</sup>. Both AuPd/rGO catalysts were synthesized with a 5.0 mM of PdCl<sub>2</sub> aqueous solution.

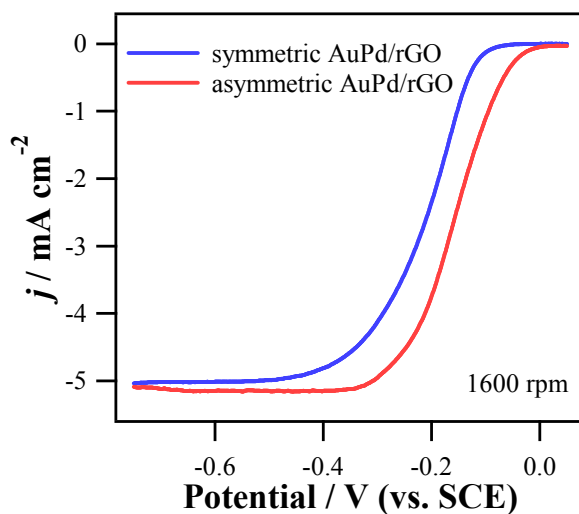

**Fig. S6** RDE polarization curves for oxygen reduction in an O<sub>2</sub>-saturated 0.1 M NaOH solution at a scan rate of 10 mV s<sup>-1</sup> (rotation speed = 1600 rpm).

**Table S1** Comparison of ICP-MS and XPS-derived elemental analyses for asymmetric Au-core Pd-shell nanoparticles.

| PdCl <sub>2</sub><br>[mM] | ICP-MS |      | XPS   |       |
|---------------------------|--------|------|-------|-------|
|                           | Au     | Pd   | Au    | Pd    |
| 0                         | 1.0    | 0.0  | 1.0   | 0.0   |
| 0.5                       | 0.72   | 0.28 | 0.353 | 0.647 |
| 5                         | 0.61   | 0.39 | 0.282 | 0.718 |
| 10                        | 0.58   | 0.42 | 0.152 | 0.848 |
